# Supplementary material
Source: Springer Nature journal article supplement (https://www.springermedizin.de/resource/supplementary/12936_2013_3122_MOESM11_ESM.pdf/9546210)
Supplement: MOESM11 [file 9546210]

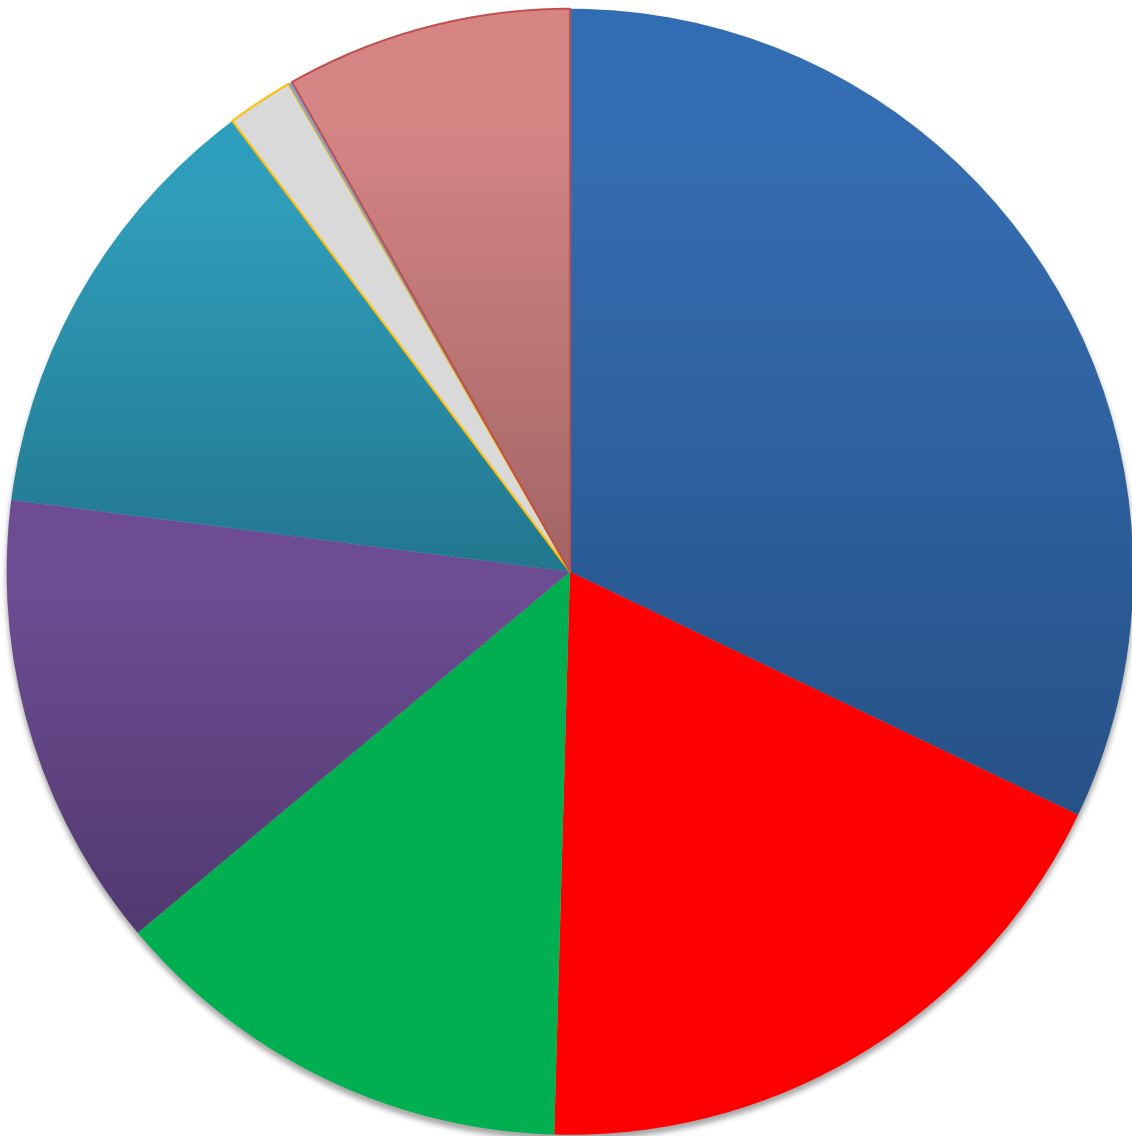

■ Headache

■ Epigastric pain

■ Nausea and vomiting

■ Dizziness

■ Anorexia

■ Changed colour of urine

■ Black colour urine

■ Others
